# Supplementary material for: The Application of Multi-Locus GWAS for the Detection of Salt-Tolerance Loci in Rice
Source: Front Plant Sci. 2018 Oct 4;9:1464. doi: 10.3389/fpls.2018.01464 (PMC6180169; doi:10.3389/fpls.2018.01464)
Supplement: TABLE S2 — Significant QTNs detected by at least two multi-locus GWAS methods. [file Table_2.XLSX]

## Sheet: Table S2
Table S2. Significant QTNs detected by at least two multi-locus GWAS methods
Trait	SNP1	Chromsome	Position	QTN effect	LOD score	PVE2(%)	Method
SSI_GI	rs1_11882948	1	11882948	0.11,0.1,0.11	4.68,3.83,3.67	1.55,0.98,1.15	2,3,5
	rs2_22250136	2	22250136	-0.11,-0.09,-0.09,-0.16	3.58,4.43,3.27,3.5	2.19,1.76,0.61,1.56	1,2,3,4
	rs2_24480757	2	24480757	0.08,0.08,0.08	3.69,4.01,3.66	1.12,0.98,1.5	2,3,6
	rs3_4264086	3	4264086	0.08,0.08	4.31,4.67	1.39,1.18	2,5
	rs3_29294598	3	29294598	0.17,0.12,0.12,0.12,0.08	5.44,5.01,6.21,4.81,3.97	5.01,3.07,3.02,2.45,3.87	1,2,3,5,6
	rs5_29590002	5	29590002	-0.15,0.07	5.55,3.5	3,0.77	5,6
	rs6_30827714	6	30827714	-0.13,-0.1,-0.11,-0.09,-0.09	4.76,5.13,6.15,3.15,3.94	2.82,2.09,2.1,1.19,2.28	1,2,3,5,6
	rs8_7832802	8	7832802	0.14,0.1,0.21,0.1	4.92,4.39,3.48,4.94	3.86,2.17,2.57,4.69	1,3,4,6
	rs8_24915626	8	24915626	0.16,0.09,0.15,0.14,0.14	4.54,3.12,6.09,4.33,7.04	3.49,1.44,3.3,2.78,4.48	1,2,3,5,6
	rs8_25014297	8	25014297	-0.29,-0.24,-0.35,-0.21	5.6,5.31,10.4,5.61	5.73,4.56,8.91,7.36	1,2,3,6
	rs8_27233581	8	27233581	0.19,0.1,0.13,0.29,0.12	6.84,3.71,5.03,7.67,5.94	6.28,2.28,3.53,4.45,5.27	1,2,3,4,6
	rs9_5893568	9	5893568	0.07,0.05,0.08	3.17,3.42,3.43	0.96,0.57,1.09	2,3,5
	rs9_7142828	9	7142828	0.14,0.25	4.65,4.68	2.52,3.54	2,4
	rs9_21139613	9	21139613	0.11,0.1	5.03,4.35	2.39,2.11	2,5
	rs10_3824947	10	3824947	-0.16,-0.17	5.37,4.28	2.73,3.52	3,6
	rs10_11718859	10	11718859	-0.21,-0.06	3.92,3.34	2,1.63	2,6
	rs11_17680260	11	17680260	0.26,0.22,0.19,0.22	9.16,9.32,6.74,10.53	9.8,7.27,4.9,9.16	1,3,5,6
	rs11_17681553	11	17681553	-0.1,-0.24	4.65,5.63	1.9,2.64	2,4
	rs11_26483326	11	26483326	-0.17,-0.13	4.73,4.45	3.69,2.61	1,2
	rs12_7825491	12	7825491	-0.09,-0.09	3.29,3.34	1.84,1.59	2,3
	rs12_14164170	12	14164170	0.09,0.13	4.43,5.95	1.58,2.92	3,6
	rs12_21121298	12	21121298	-0.13,-0.09,-0.09	3.04,4.35,3.89	2.06,1.36,1.03	1,2,5
	rs12_24043265	12	24043265	-0.14,-0.09	3.64,3.92	3.66,1.98	1,2
SSI_VI	rs1_24580967	1	24580967	-0.1,-0.08	6.79,5.16	4.65,3.27	2,3
	rs2_454129	2	454129	0.06,0.07	5.84,3.07	2.18,1.37	2,3
	rs2_1187798	2	1187798	0.1,0.08	7.04,3.38	5.11,1.88	2,5
	rs2_34571439	2	34571439	0.05,0.04	3.76,3.25	1.18,0.54	2,4
	rs3_29294598	3	29294598	0.07,0.06	3.9,5.35	4.57,2.22	1,5
	rs4_5074705	4	5074705	0.1,0.06	5.49,3.53	3.98,1.46	2,3
	rs5_29590002	5	29590002	-0.1,0.04,0.09,-0.07	3.61,3.87,3.5,4.36	5.77,1.26,1.67,2.14	1,2,4,5
	rs6_26952785	6	26952785	0.11,0.11,0.1	3.89,8.59,7.11	3.22,3.55,3.57	1,3,6
	rs8_7832802	8	7832802	0.06,0.06	5.91,4.96	3.74,2.12	2,5
	rs8_24915626	8	24915626	0.05,-0.12	3.31,5.64	1.39,7.92	2,6
	rs8_27233581	8	27233581	0.08,0.13,0.07,0.06	5.44,5.12,5.45,5.22	5.17,3.4,2.38,3.69	1,4,5,6
	rs9_7262109	9	7262109	0.06,0.04	4.47,5.18	2.04,1.65	2,3
	rs9_20908000	9	20908000	0.05,0.07	3.52,7.23	1.17,6.33	5,6
	rs10_2806159	10	2806159	0.12,0.12,0.08	3.71,5.42,3.16	3.54,3.55,1.85	1,2,6
	rs10_3824947	10	3824947	-0.1,-0.06	8.18,3.1	3.31,3.02	3,6
	rs10_11718859	10	11718859	-0.05,-0.13,-0.06,3.56	5.21,6.29,6.36,4.28	1.99,3.2,1.74,1.94	2,4,5
	rs11_11859724	11	11859724	0.11,0.12	5.32,6.09	5.9,8.97	3,6
	rs11_17680260	11	17680260	0.1,0.08,0.07	5.68,4.76,3.12	7.16,3.03,3.51	1,5,6
SSI_MGT	rs1_15357371	1	15357371	0.45,0.43,1.37,0.61,0.49	5.33,4.07,6.54,5.74,4.91	3.99,3.63,5.64,3.97,2.95	2,3,4,5,6
	rs1_41352873	1	41352873	-0.35	3.35	2.84	2
	rs2_23991498	2	23991498	0.26,0.28,0.28,0.33	3.72,4.07,3.06,6.62	1.61,1.94,1.66,3.48	2,3,5,6
	rs4_13696726	4	13696726	-0.98,-0.67,-0.44	6.03,4.39,3.54	4.88,2.94,1.79	1,3,6
	rs6_27383612	6	27383612	0.29,0.28	3.55,3.74	1.6,1.85	3,6
	rs6_27962052	6	27962052	-0.43,-0.4,-0.26,-0.41	3.9,3.95,3.75,4.55	2.18,2.42,1.06,4.81	1,2,3,6
	rs7_22482655	7	22482655	-0.48,0.4	3.45,4.6	3.26,5.17	1,6
	rs8_20548722	8	20548722	-0.45,-0.45	3.34,3.7	1.73,3.67	2,6
	rs9_4258702	9	4258702	-0.53,-0.48,-0.41	6.16,7.96,5.71	3.35,2.76,2.88	2,3,6
	rs9_11450011	9	11450011	-0.36,-0.31,-0.34	5.53,3.18,4.48	3.07,1.94,3.55	2,3,6
	rs11_17222751	11	17222751	-0.54,-0.41	5.51,3.2	2.99,3.45	3,6
	rs11_24660808	11	24660808	-0.79,-0.64,-0.44	3.3,3.44,4.19	2.88,2.49,2.47	1,3,6
	rs12_6895835	12	6895835	1.03,0.57	6.37,3.43	6.42,2.59	1,3
	rs12_17938391	12	17938391	-0.43,-0.4	3.95,6.24	1.69,4.06	3,6
SSI_IR_48h	rs1_2103242	1	2103242	0.83,0.64,0.96	6.24,5.53,3.39	3.92,2.57,1.46	1,2,4
	rs1_5453364	1	5453364	-0.58,-0.6,-0.48,-1.26,-0.58,-0.62	3.23,4.96,3.99,4.44,4.76,6.79	1.81,2.16,1.45,2.64,0.86,3.51	1,2,3,4,5,6
	rs1_22348707	1	22348707	-0.35,-0.52	3.25,3.84	0.74,2.23	3,6
	rs1_31748567	1	31748567	-0.83,-0.58,-0.61,-0.56	6.43,4.99,4.04,5.66	3.55,2.04,0.98,2.59	1,3,5,6
	rs2_1572823	2	1572823	0.63	6.07	2	3
	rs2_8558888	2	8558888	0.49	3.73	2.04	6
	rs2_20360147	2	20360147	-0.65,-0.52	5.29,4.12	2.75,1.93	2,6
	rs2_24073194	2	24073194	0.7,-0.62,0.72	4.8,3.58,5.04	1.56,0.62,2.2	3,5,6
	rs3_14512032	3	14512032	-1.08,-0.65	5.39,3.78	3.77,0.63	1,5
	rs3_20204466	3	20204466	1.02,0.89,0.93	6.73,3.81,5.43	2.76,0.82,2.76	3,5,6
	rs4_4695323	4	4695323	-1.5,-0.78,-0.82	3.29,4.91,5.61	1.48,1.51,1.9	2,3,6
	rs4_19346022	4	19346022	1.09,0.84	7.85,5.08	3.05,2.6	3,6
	rs4_31202952	4	31202952	-0.67,-0.52,-0.57	3.43,4.14,5.63	2.37,1.61,2.19	1,2,3
	rs6_1459330	6	1459330	0.64,0.62,1.1	3.34,5.38,3.78	1.66,1.71,1.51	1,2,4
	rs7_21649301	7	21649301	1.6,1.08,1.2	6.08,4.4,4.99	3.78,1.93,1	1,2,5
	rs8_19557622	8	19557622	-0.84,-1.36	4.19,3.85	3.13,2.42	1,4
	rs9_9459212	9	9459212	0.71,0.62	4.01,4.06	1.67,2.71	3,6
	rs9_16504971	9	16504971	1.14,0.97	6.66,5.03	3.64,3.65	3,6
	rs10_3814674	10	3814674	0.68,0.73	3.93,6.74	2.67,1.42	1,5
	rs10_10209541	10	10209541	0.67,1.03,0.97	3.54,6.1,6.61	1.64,1.51,3.98	3,5,6
	rs11_24921632	11	24921632	-0.86,-0.69	7.73,5.34	2.36,1.89	3,6
	rs11_25891438	11	25891438	0.81,0.79	4.99,4.69	1.59,1.97	3,6
	rs11_27407533	11	27407533	0.91,0.47	4.59,3.05	2.4,1.21	1,6
	rs11_28865880	11	28865880	0.92,0.7,0.83,1.65,0.74,0.73	6.68,5.83,10,6.97,6.05,9.04	4.55,3.01,4.48,4.45,1.38,4.83	1,2,3,4,5,6
	rs12_7176832	12	7176832	-0.97,-0.96,-1.43,-0.84,-1.01	6.16,8.64,4.43,5.39,8.59	3.82,3.99,3.52,1.2,4.91	2,3,4,5,6
	rs12_19111880	12	19111880	-0.78,-0.89,-0.78,-1.66,-0.66,-0.81	3.14,6.51,6.44,5.15,3.98,7.23	1.86,2.7,2.17,2.62,0.62,2.97	1,2,3,4,5,6
SSI_GR_5d	rs1_11882948	1	11882948	0.15,0.13,0.12	3.03,3.94,3.38	1.99,1.69,1.97	1,2,6
	rs1_22648607	1	22648607	0.17,0.23,0	4.49,6.57,0	1.36,1.85,0	3,5,0
	rs3_4264086	3	4264086	0.18,0.13,0.21,0.11,0.11	6.43,5.96,3.97,5.79,6.13	4.47,2.71,1.73,1.42,2.16	1,2,4,5,6
	rs3_29294598	3	29294598	0.1,0.11	3.61,3.59	1.72,1.34	2,5
	rs5_29609065	5	29609065	0.17,0.11,0.22,0.14,0.08	4.66,4.39,3.74,5.74,3.34	3.86,1.94,1.75,1.85,0.96	1,2,4,5,6
	rs7_1171356	7	1171356	0.15,0.28	4.77,4.48	3.58,3.26	1,4
	rs7_20722591	7	20722591	0.16,0.13	6.09,4.02	2.58,2.42	3,6
	rs8_20685512	8	20685512	0.21,0.15	4.58,3.1	2.39,1.37	3,6
	rs8_24915626	8	24915626	0.15,0.11,0.13	4.1,3.31,3.6	3.01,1.59,1.5	2,3,5
	rs8_25014297	8	25014297	-0.22,-0.2	3.22,5.42	2.94,5.36	3,6
	rs8_27233581	8	27233581	0.09,0.28,0.1	3.09,4.66,4.36	1.36,3.01,3.33	3,4,6
	rs9_8174432	9	8174432	0.15,0.1,0.12	4.1,4.23,3.26	2.84,1.52,1.29	1,2,5
	rs9_21139613	9	21139613	0.19,0.13,0.11	3.58,4.77,5.02	4.79,1.61,2.62	1,5,6
	rs10_2779442	10	2779442	-0.27,-0.24	4.5,5.31	4.39,5.92	3,6
	rs10_11718859	10	11718859	-0.13,-0.12,-0.23,-0.11	5.33,5.76,4.32,4.48	2.5,1.9,2.03,1.17	2,3,4,5
	rs11_17680260	11	17680260	0.19,0.16	5.42,4.75	4.42,4.58	3,6
	rs11_27380577	11	27380577	-0.13,-0.14	3.04,3.26	1.15,1.84	2,6
	rs11_27392033	11	27392033	-0.23,-0.14,-0.31,-0.18,-0.12	6.37,3.93,4.19,5.6,4.05	4.65,1.86,2.07,2.12,1.07	1,2,4,5,6
	rs12_15989886	12	15989886	0.18,0.12	4.19,3.79	2.6,1.44	1,2
	rs12_18618057	12	18618057	0.1,0.11	3.19,3.71	1.12,1.23	2,3
SSI_GR_10d	rs1_3401561	1	3401561	-0.24,-0.15,-0.14,0	4.08,4.65,3.21,0	6.08,3.14,2.29	1,3,5
	rs1_11882948	1	11882948	0.11,0.12,0.1	3.35,4.56,3.54	1.31,1.72,1.66	2,3,6
	rs1_22860772	1	22860772	-0.16,-0.15	4.69,4.19	1.93,2.2	3,6
	rs2_8009453	2	8009453	0.15,0.11,0.08	3.91,4.96,3.34	3.31,2.18,1.18	1,2,3
	rs2_22247315	2	22247315	-0.14,-0.12,-0.17	4.8,3.54,6.51	1.46,0.95,3.19	3,5,6
	rs4_4774290	4	4774290	-0.06,-0.09	3.22,5.74	0.7,3.11	5,6
	rs4_19568498	4	19568498	0.21,0.17,0.16	6.37,5.51,5.39	2.96,1.9,2.2	2,3,6
	rs5_17752266	5	17752266	-0.11,-0.13	4.43,5.29	2.21,2.89	2,5
	rs6_26597879	6	26597879	0.12,0.11,0.13	3.83,4.91,5.41	2.8,2.44,2.82	2,3,5
	rs7_3788168	7	3788168	0.22,0.23,0.22	5.46,7.54,7.46	2.54,2.98,3.59	2,3,6
	rs7_22276671	7	22276671	0.1,0.09,0.09	4.64,4.66,3.65	1.97,1.57,2.33	2,3,6
	rs8_7832802	8	7832802	0.15,0.09	8.76,4.29	4.69,3.04	3,6
	rs8_24915626	8	24915626	0.13,0.14,0.13	3.88,5.28,5.8	2.07,3.16,2.67	1,2,3
	rs9_6083713	9	6083713	0.2,0.12	3.61,5.73	2.11,2.64	2,5
	rs9_21139613	9	21139613	0.18,0.11,0.17,0.1	5.88,3.55,8.69,4.7	4.59,1.92,4.38,2.84	1,2,5,6
	rs10_22754603	10	22754603	0.17,0.13,0.08,0.13,0.09	5.56,4.93,3.46,5.94,3.73	3.08,2.14,0.93,2.17,1.43	1,2,3,5,6
	rs11_27380577	11	27380577	-0.21,-0.17,-0.17,-0.13,-0.2	4.76,4.13,5.42,3.24,7.31	2.84,2.13,2.26,1.11,4.4	1,2,3,5,6
	rs12_7825491	12	7825491	-0.12,-0.12	3.95,3.76	2.66,2.41	2,5
	rs12_24043265	12	24043265	-0.19,-0.1	5.45,3.84	6.18,2.06	1,5
	rs12_26433001	12	26433001	0.07,0.08	3.27,3.88	0.98,1.37	3,5
SSI_IR_24h	rs3_35364805	3	35364805	2.72,3.17	3.79,6.02	2.77,5.01	2,6
	rs4_21409116	4	21409116	2.37,2.99	3.03,3.31	1.31,1.72	3,5
	rs4_31794832	4	31794832	2.91,3.07,2.59	6.97,4.35,3.9	0.11,2.24,2.65	1,3,6
	rs4_35193109	4	35193109	2.89,2.77	7.78,3.23	0.07,1.86	1,6
	rs5_19332728	5	19332728	-1.79,-1.77	3.42,3.99	1.54,2.74	3,6
	rs6_5699431	6	5699431	3.43,2.61,2.33,4.08	9.05,3.6,3.42,10.18	0.09,1.77,1.61,6.9	1,2,3,6
	rs6_28577137	6	28577137	2.22,2.86	3.36,5.23	1.57,2.73	2,6
	rs8_687849	8	687849	7.21,3.17	5.06,4.03	3.31,2.06	4,5
	rs9_6746183	9	6746183	-10.84,-4.22,-5.46,-4.78	16.12,3.29,7.16,7.47	0.97,1.77,5.3,5.91	1,2,3,6
	rs9_12353804	9	12353804	-4.57,-3.83,-3.5	18.97,4.95,5.46	0.3,3.7,5.3	1,3,6
	rs11_25222143	11	25222143	6,1.83	16.42,3.4	0.2,2.46	1,6
	rs11_27142982	11	27142982	-3.17,-4.37	11.48,10.55	0.19,5.51	1,6
	rs12_19996413	12	19996413	-2.35,-1.62	4.27,3.31	1.99,1.69	3,6
1 SNPs in bold font are pleiotropic QTNs which were detected associate with more than one traits
2 PVE means phenotypic variation explained
3 1:mrMLM; 2:FASTmrMLM; 3:ISIS EM-BLASSO; 4:FASTmrEMMA; 5:pLARmEB; 6:pKWmEB
