# Supplementary material for: The Application of Multi-Locus GWAS for the Detection of Salt-Tolerance Loci in Rice
Source: Front Plant Sci. 2018 Oct 4;9:1464. doi: 10.3389/fpls.2018.01464 (PMC6180169; doi:10.3389/fpls.2018.01464)
Supplement: TABLE S3 — Results of a GO enrichment analysis. [file Table_3.XLSX]

## Sheet: Table S3
Table S3. Results of a GO enrichment analysis
GO term	Ontology	Description	Number in input list	Number in BG/Ref	p-value	FDR
GO:0006629	P	lipid metabolic process	17	528	0.00013	0.058
GO:0044255	P	cellular lipid metabolic process	9	229	0.0014	0.31
GO:0044283	P	small molecule biosynthetic process	10	320	0.0039	0.31
GO:0055085	P	transmembrane transport	16	701	0.0064	0.31
GO:0060255	P	regulation of macromolecule metabolic process	29	1640	0.011	0.31
GO:0050789	P	regulation of biological process	36	2027	0.0042	0.31
GO:0065007	P	biological regulation	36	2125	0.0086	0.31
GO:0009889	P	regulation of biosynthetic process	28	1564	0.01	0.31
GO:0050794	P	regulation of cellular process	35	1955	0.0042	0.31
GO:0010556	P	regulation of macromolecule biosynthetic process	28	1564	0.01	0.31
GO:0031326	P	regulation of cellular biosynthetic process	28	1564	0.01	0.31
GO:0045449	P	regulation of transcription	28	1513	0.0068	0.31
GO:0010468	P	regulation of gene expression	29	1577	0.0064	0.31
GO:0019219	P	regulation of nucleobase, nucleoside, nucleotide and nucleic acid metabolic process	28	1520	0.0072	0.31
GO:0051171	P	regulation of nitrogen compound metabolic process	28	1520	0.0072	0.31
