# Supplementary material for: The Application of Multi-Locus GWAS for the Detection of Salt-Tolerance Loci in Rice
Source: Front Plant Sci. 2018 Oct 4;9:1464. doi: 10.3389/fpls.2018.01464 (PMC6180169; doi:10.3389/fpls.2018.01464)
Supplement: TABLE S4 — Gene annotations for the 56 significant QTNs associated with salt tolerance traits. [file Table_4.XLSX]

## Sheet: Table S4
Table S4. Gene annotations for the 56 significant QTNs associated with salt tolerance traits
SNP*	Chromsome	Position	Impact	Effect	Gene ID	Annotation (MSU.7.0)
rs1_11882948	1	11882948	intergenic_region	MODIFIER	LOC_Os01g21270-LOC_Os01g21290	LOC_Os01g21270|retrotransposon protein, putative, unclassified, expressed
rs2_22250136	2	22250136	intergenic_region	MODIFIER	LOC_Os02g36870-LOC_Os02g36880	LOC_Os02g36870|YGL010w, putative, expressed
rs2_24480757	2	24480757	intergenic_region	MODIFIER	LOC_Os02g40410-LOC_Os02g40420	LOC_Os02g40410|expressed protein
rs3_29294598	3	29294598	Promoter_upstream_gene_variant	MODIFIER	LOC_Os03g51210	LOC_Os03g51210|expressed protein
rs6_30827714	6	30827714	intergenic_region	MODIFIER	LOC_Os06g50930-LOC_Os06g50940	LOC_Os06g50930|rhodanese-like domain containing protein, putative, expressed
rs8_7832802	8	7832802	intergenic_region	MODIFIER	LOC_Os08g13170-LOC_Os08g13180	LOC_Os08g13170|retrotransposon protein, putative, unclassified, expressed
rs8_24915626	8	24915626	intergenic_region	MODIFIER	LOC_Os08g39400-LOC_Os08g39410	LOC_Os08g39400|expressed protein
rs8_25014297	8	25014297	intergenic_region	MODIFIER	LOC_Os08g39540-LOC_Os08g39550	LOC_Os08g39540|zinc knuckle domain containing protein, expressed
rs8_27233581	8	27233581	intergenic_region	MODIFIER	LOC_Os08g43080-LOC_Os08g43090	LOC_Os08g43080|POLD4B - Putative DNA polymerase delta complex subunit, expressed
rs9_5893568	9	5893568	intergenic_region	MODIFIER	LOC_Os09g10790-LOC_Os09g10800	LOC_Os09g10790|retrotransposon protein, putative, unclassified, expressed
rs11_17680260	11	17680260	intergenic_region	MODIFIER	LOC_Os11g30410-LOC_Os11g30430	LOC_Os11g30410|ThiF family domain containing protein, putative, expressed
rs12_21121298	12	21121298	intergenic_region	MODIFIER	LOC_Os12g34780-LOC_Os12g34790	LOC_Os12g34780|expressed protein
rs5_29590002	5	29590002	intron_variant	MODIFIER	LOC_Os05g51610	LOC_Os05g51610|sodium/calcium exchanger protein, putative, expressed
rs6_26952785	6	26952785	missense_variant	MODERATE	LOC_Os06g44630	LOC_Os06g44630|expressed protein
rs8_27233581	8	27233581	intergenic_region	MODIFIER	LOC_Os08g43080-LOC_Os08g43090	LOC_Os08g43080|POLD4B - Putative DNA polymerase delta complex subunit, expressed
rs10_2806159	10	2806159	intron_variant	MODIFIER	LOC_Os10g05620	LOC_Os10g05620|transposon protein, putative, unclassified, expressed
rs10_11718859	10	11718859	intergenic_region	MODIFIER	LOC_Os10g22580-LOC_Os10g22590	LOC_Os10g22580|hypothetical protein
rs11_17680260	11	17680260	intergenic_region	MODIFIER	LOC_Os11g30410-LOC_Os11g30430	LOC_Os11g30410|ThiF family domain containing protein, putative, expressed
rs1_15357371	1	15357371	intron_variant	MODIFIER	LOC_Os01g27520	LOC_Os01g27520|tRNA synthetases class II domain containing protein, expressed
rs2_23991498	2	23991498	intergenic_region	MODIFIER	LOC_Os02g39710-LOC_Os02g39720	LOC_Os02g39710|CCT/B-box zinc finger protein, putative, expressed
rs4_13696726	4	13696726	intergenic_region	MODIFIER	LOC_Os04g23940-LOC_Os04g23960	LOC_Os04g23940|chalcone synthase, putative, expressed
rs6_27962052	6	27962052	intron_variant	MODIFIER	LOC_Os06g46149	LOC_Os06g46149|serine/arginine repetitive matrix protein 1, putative, expressed
rs9_4258702	9	4258702	intergenic_region	MODIFIER	LOC_Os09g08210-LOC_Os09g08224	LOC_Os09g08210|expressed protein
rs9_11450011	9	11450011	synonymous_variant	LOW	LOC_Os09g19160	LOC_Os09g19160|serine/threonine-protein kinase, putative, expressed
rs11_24660808	11	24660808	intergenic_region	MODIFIER	LOC_Os11g41160-LOC_Os11g41170	LOC_Os11g41160|phosphoserine phosphatase, chloroplast precursor, putative, expressed
rs4_31794832	4	31794832	synonymous_variant	LOW	LOC_Os04g53380	LOC_Os04g53380|expressed protein
rs6_5699431	6	5699431	intergenic_region	MODIFIER	LOC_Os06g10900-LOC_Os06g10910	LOC_Os06g10900|DELLA protein RGL3, putative, expressed
rs9_12353804	9	12353804	intergenic_region	MODIFIER	LOC_Os09g20480-LOC_Os09g20490	LOC_Os09g20480|transporter, putative, expressed
rs9_6746183	9	6746183	missense_variant	MODERATE	LOC_Os09g11970	LOC_Os09g11970|keratin, type II cytoskeletal 2 epidermal, putative, expressed
rs1_2103242	1	2103242	Promoter_upstream_gene_variant	MODIFIER	LOC_Os01g04670	LOC_Os01g04670|expressed protein
rs1_5453364	1	5453364	intergenic_region	MODIFIER	LOC_Os01g10350-LOC_Os01g10370	LOC_Os01g10350|MPPN domain containing protein, expressed
rs1_31748567	1	31748567	missense_variant	MODERATE	LOC_Os01g55180	LOC_Os01g55180|expressed protein
rs2_24073194	2	24073194	intron_variant	MODIFIER	LOC_Os02g39840	LOC_Os02g39840|eukaryotic initiation factor iso-4F subunit p82-34, putative, expressed
rs3_20204466	3	20204466	missense_variant	MODERATE	LOC_Os03g36470	LOC_Os03g36470|retrotransposon protein, putative, unclassified, expressed
rs4_4695323	4	4695323	intergenic_region	MODIFIER	LOC_Os04g08640-LOC_Os04g08650	LOC_Os04g08640|cadmium tolerance factor, putative, expressed
rs4_31202952	4	31202952	Promoter_upstream_gene_variant	MODIFIER	LOC_Os04g52479	LOC_Os04g52479|peptidase, trypsin-like serine and cysteine proteases, putative, expressed
rs6_1459330	6	1459330	5_prime_UTR_variant	MODIFIER	LOC_Os06g03700	LOC_Os06g03700|oligopeptide transporter, putative, expressed
rs7_21649301	7	21649301	intergenic_region	MODIFIER	LOC_Os07g36220-LOC_Os07g36230	LOC_Os07g36220|expressed protein
rs10_10209541	10	10209541	intron_variant	MODIFIER	LOC_Os10g20300	LOC_Os10g20300|expressed protein
rs11_28865880	11	28865880	intergenic_region	MODIFIER	LOC_Os11g47860-LOC_Os11g47870	LOC_Os11g47860|expressed protein
rs12_7176832	12	7176832	Promoter_upstream_gene_variant	MODIFIER	LOC_Os12g12950	LOC_Os12g12950|expressed protein
rs12_19111880	12	19111880	intron_variant	MODIFIER	LOC_Os12g31748	LOC_Os12g31748|OsMADS20 - MADS-box family gene with MIKCc type-box, expressed
rs1_11882948	1	11882948	intergenic_region	MODIFIER	LOC_Os01g21270-LOC_Os01g21290	LOC_Os01g21270|retrotransposon protein, putative, unclassified, expressed
rs1_22648607	1	22648607	intron_variant	MODIFIER	LOC_Os01g40150	LOC_Os01g40150|eukaryotic translation initiation factor 5B, putative, expressed
rs3_4264086	3	4264086	intergenic_region	MODIFIER	LOC_Os03g08350-LOC_Os03g08360	LOC_Os03g08350|ubiquitin carboxyl-terminal hydrolase, family 1, putative, expressed
rs3_29294598	3	29294598	Promoter_upstream_gene_variant	MODIFIER	LOC_Os03g51210	LOC_Os03g51210|expressed protein
rs5_29609065	5	29609065	Promoter_upstream_gene_variant	MODIFIER	LOC_Os05g51630	LOC_Os05g51630|early-responsive to dehydration protein-related, putative, expressed
rs7_1171356	7	1171356	intergenic_region	MODIFIER	LOC_Os07g03070-LOC_Os07g03080	LOC_Os07g03070|tetratricopeptide repeat containing protein, putative, expressed
rs8_24915626	8	24915626	intergenic_region	MODIFIER	LOC_Os08g39400-LOC_Os08g39410	LOC_Os08g39400|expressed protein
rs8_27233581	8	27233581	intergenic_region	MODIFIER	LOC_Os08g43080-LOC_Os08g43090	LOC_Os08g43080|POLD4B - Putative DNA polymerase delta complex subunit, expressed
rs9_8174432	9	8174432	intron_variant	MODIFIER	LOC_Os09g13890	LOC_Os09g13890|calmodulin binding protein, putative, expressed
rs9_21139613	9	21139613	intergenic_region	MODIFIER	LOC_Os09g36630-LOC_Os09g36640	LOC_Os09g36630|expressed protein
rs10_11718859	10	11718859	intergenic_region	MODIFIER	LOC_Os10g22580-LOC_Os10g22590	LOC_Os10g22580|hypothetical protein
rs11_27392033	11	27392033	intergenic_region	MODIFIER	LOC_Os11g45260-LOC_Os11g45270	LOC_Os11g45260|expressed protein
rs1_3401561	1	3401561	missense_variant	MODERATE	LOC_Os01g07212	LOC_Os01g07212|staphylococcal nuclease homologue, putative, expressed
rs1_11882948	1	11882948	intergenic_region	MODIFIER	LOC_Os01g21270-LOC_Os01g21290	LOC_Os01g21270|retrotransposon protein, putative, unclassified, expressed
rs2_8009453	2	8009453	intron_variant	MODIFIER	LOC_Os02g14530	LOC_Os02g14530|protein kinase domain containing protein, expressed
rs2_22247315	2	22247315	3_prime_UTR_variant	MODIFIER	LOC_Os02g36870	LOC_Os02g36870|YGL010w, putative, expressed
rs4_19568498	4	19568498	intergenic_region	MODIFIER	LOC_Os04g32510-LOC_Os04g32540	LOC_Os04g32510|expressed protein
rs6_26597879	6	26597879	intergenic_region	MODIFIER	LOC_Os06g44100-LOC_Os06g44120	LOC_Os06g44100|HLS, putative, expressed
rs7_3788168	7	3788168	intergenic_region	MODIFIER	LOC_Os07g07570-LOC_Os07g07580	LOC_Os07g07570|hypothetical protein
rs7_22276671	7	22276671	intergenic_region	MODIFIER	LOC_Os07g37180-LOC_Os07g37190	LOC_Os07g37180|ABC1 family domain containing protein, putative, expressed
rs8_24915626	8	24915626	intergenic_region	MODIFIER	LOC_Os08g39400-LOC_Os08g39410	LOC_Os08g39400|expressed protein
rs9_21139613	9	21139613	intergenic_region	MODIFIER	LOC_Os09g36630-LOC_Os09g36640	LOC_Os09g36630|expressed protein
rs10_22754603	10	22754603	intron_variant	MODIFIER	LOC_Os10g42250	LOC_Os10g42250|expressed protein
rs11_27380577	11	27380577	intron_variant	MODIFIER	LOC_Os11g45240	LOC_Os11g45240|retrotransposon protein, putative, Ty3-gypsy subclass, expressed
*SNPs in bold font are pleiotropic QTNs which were detected associate with more than two traits
